# Supplementary material for: Breaking Trade‐Off between Selectivity and Activity of Nickel‐Based Hydrogenation Catalysts by Tuning Both Steric Effect and d‐Band Center
Source: PubMed Central journal article supplement (PMC6523378; doi:10.1002/advs.201900054), 2019-03-25
Supplement: ADVS-6-1900054-s001.pdf [file ADVS-6-1900054-s001.pdf]

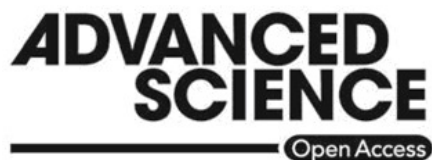

## Supporting Information

for *Adv. Sci.*, DOI: 10.1002/adv.201900054

**Breaking Trade-Off between Selectivity and Activity of Nickel-Based Hydrogenation Catalysts by Tuning Both Steric Effect and d-Band Center**

*Ruijie Gao, Lun Pan, Huiwen Wang, Yunduo Yao, Xiangwen Zhang, Li Wang, and Ji-Jun Zou\**

## Supporting Information

### **Breaking Trade-Off between Selectivity and Activity of Nickel-Based Hydrogenation Catalysts by Tuning both Steric Effect and d-Band Center**

Ruijie Gao, Lun Pan, Huiwen Wang, Yunduo Yao, Xiangwen Zhang, Li Wang, Ji-Jun Zou\*

## Supplemental Experimental procedures

### Chemicals.

All chemicals (AR grade) were used as received without any further purification. Water with a resistivity of 18.2 M $\Omega$ ·cm was used for all experiments. All glassware was thoroughly washed by 1M hydrochloric acid to avoid any possible contamination.

**Synthesis of hierarchical Ni<sub>2</sub>P nanosheets.** Synthesis of hierarchical Ni<sub>2</sub>P nanosheets involves two steps: synthesis of hierarchical Ni(OH)<sub>2</sub> and following phosphatization. The preparation of Ni(OH)<sub>2</sub> nanosheets was performed as follows. Typically, 0.24 mmol of NiCl<sub>2</sub> and 4.8 mmol of urea were dissolved in 100 mL of distilled water. After the mixture was stirred for 10 min, the mixed solution was kept at 90 °C for 48 h. Finally, the precipitates were washed three times with water and ethanol, respectively, and dried at 80 °C for 6 h to obtain Ni(OH)<sub>2</sub> nanosheets. To synthesize Ni<sub>2</sub>P nanosheets, 200 mg of sodium hypophosphite (NaH<sub>2</sub>PO<sub>2</sub>) was put in the uptake and 30 mg of Ni(OH)<sub>2</sub> was put in the downtake, and then calcined at 325 °C for 1 h under Ar atmosphere to realize phosphorization of nickel. After that, the powders were washed for 3 times using deionized water to remove unconverted sodium hypophosphite, and then dried under 60 °C.

### Supplemental Characterization.

Dynamic CO pulsed chemisorption was also performed on a Micromeritics ASAP 2920 automatic analyzer equipped with a TCD. The passivated catalyst sample (50 mg, maintained at room temperature for 3 h in 0.5 wt.% O<sub>2</sub>/N<sub>2</sub>) was loaded into a quartz reactor and reduced in H<sub>2</sub> flow (99.999%, 100 mL/min STP) at 500 °C for 2 h with a ramp of 10 °C/min. Then the sample was purged with He (99.999%, 50 mL/min STP) at 500 °C for 2 h and cooled to 35 °C under a He flow. The CO pulse was repeatedly injected until the response from the detector showed no further CO uptake after consecutive injections.

The attenuated total reflection infrared (ATR-IR) spectroscopy was acquired with a Bruker Equinox 55 spectrometer equipped with a DLaTGS detector and operated at room temperature and atmospheric pressure. Before the test, the catalyst was dispersed into the ethanol and treated with ultrasonic for 30 min. then, the suspension was dropwise added onto the surface of the diamond crystal equipped on the instrument at the reaction temperature. After about 2 hours, the catalyst dried at 90 °C. Here, the background spectrum was recorded before the substrate solution was added.

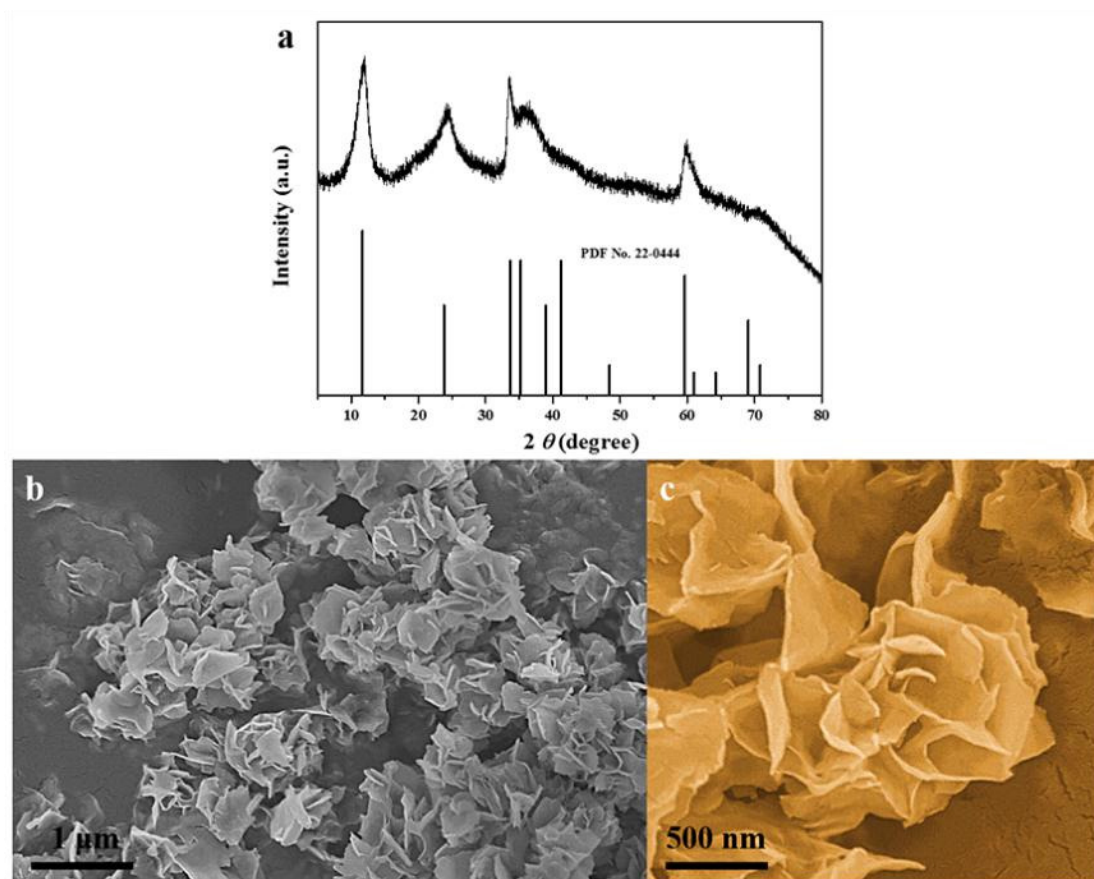

**Figure S1.** (a) XRD pattern and (b)(c) SEM images of Ni(OH)<sub>2</sub> NSs.

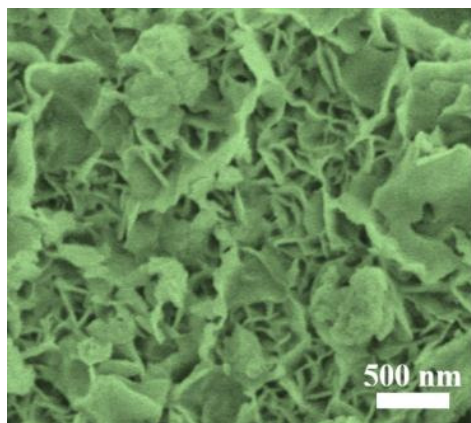

**Figure S2.** SEM image of Ni<sub>2</sub>P.

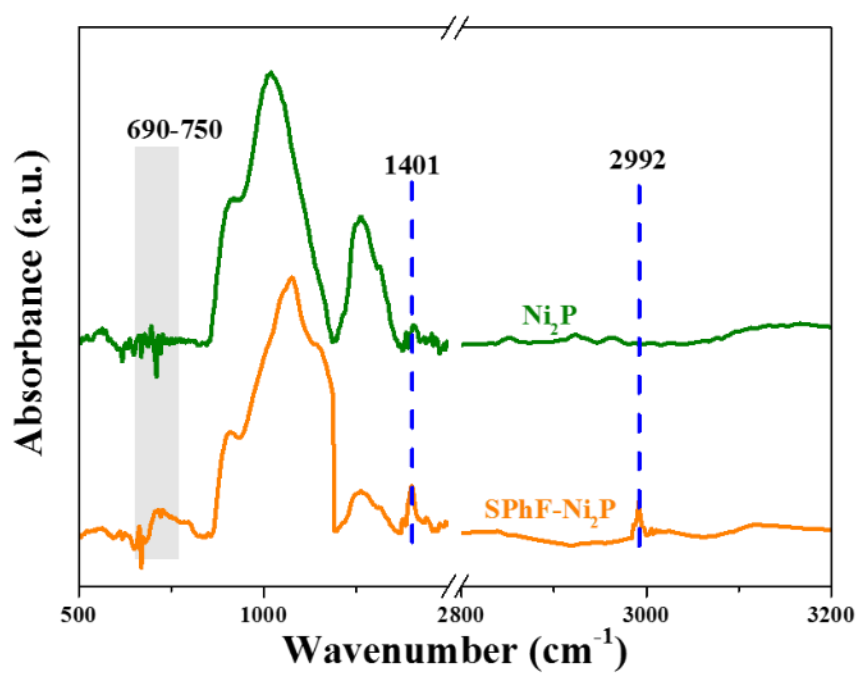

Figure S3. FT-IR spectra of pristine  $\text{Ni}_2\text{P}$  and SPhF- $\text{Ni}_2\text{P}$ .

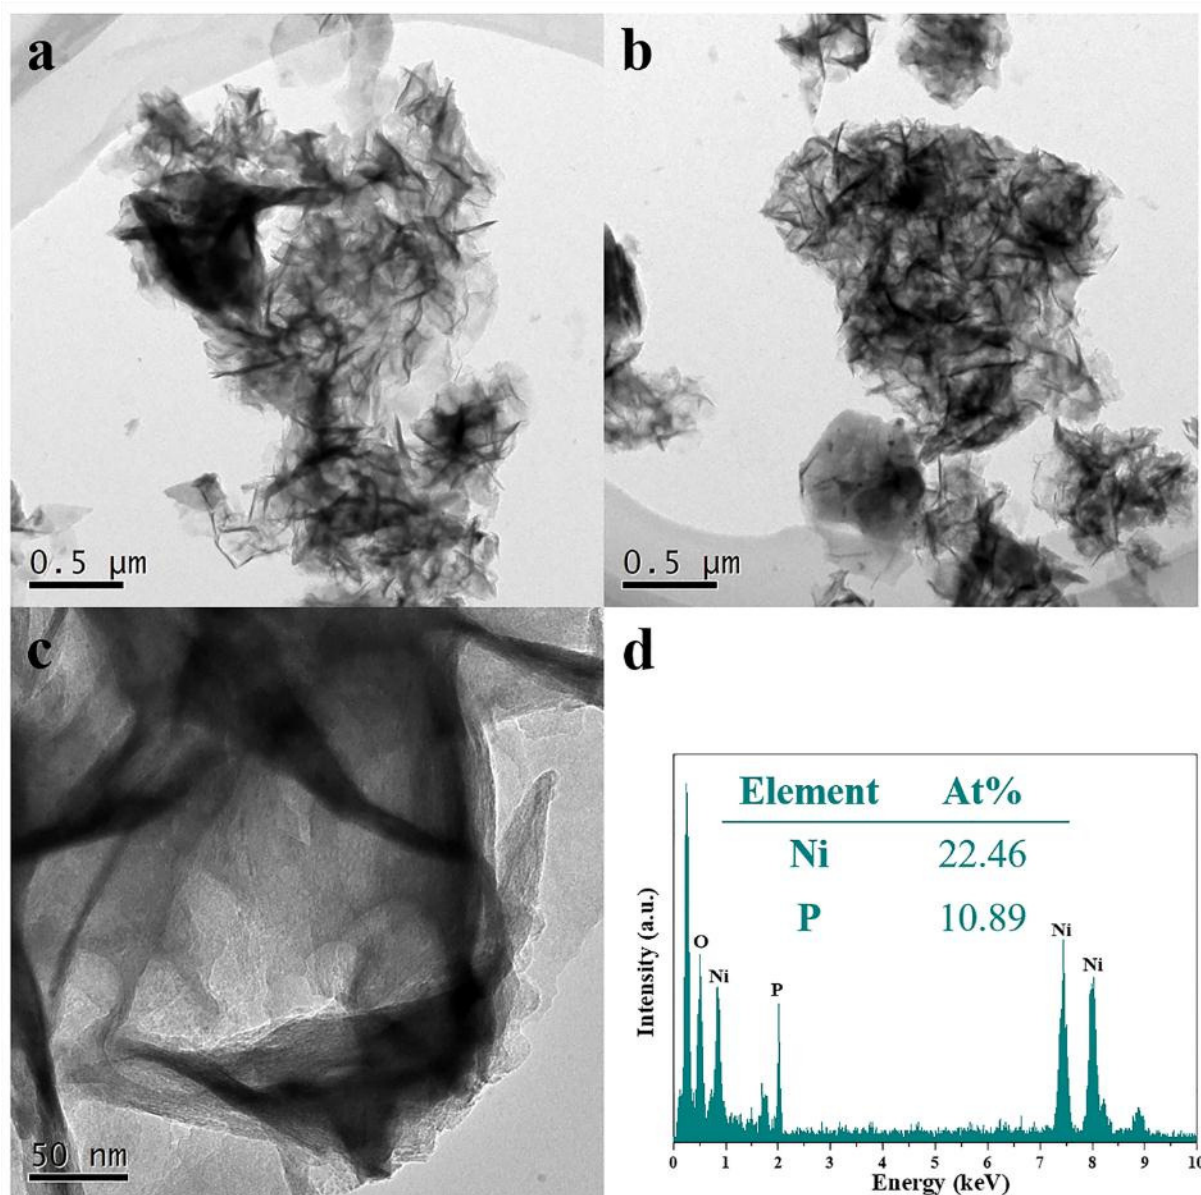

**Figure S4.** (a), (b), and (c) TEM images of Ni<sub>2</sub>P NSs. (d) TEM-EDX spectrum of Ni<sub>2</sub>P NSs.

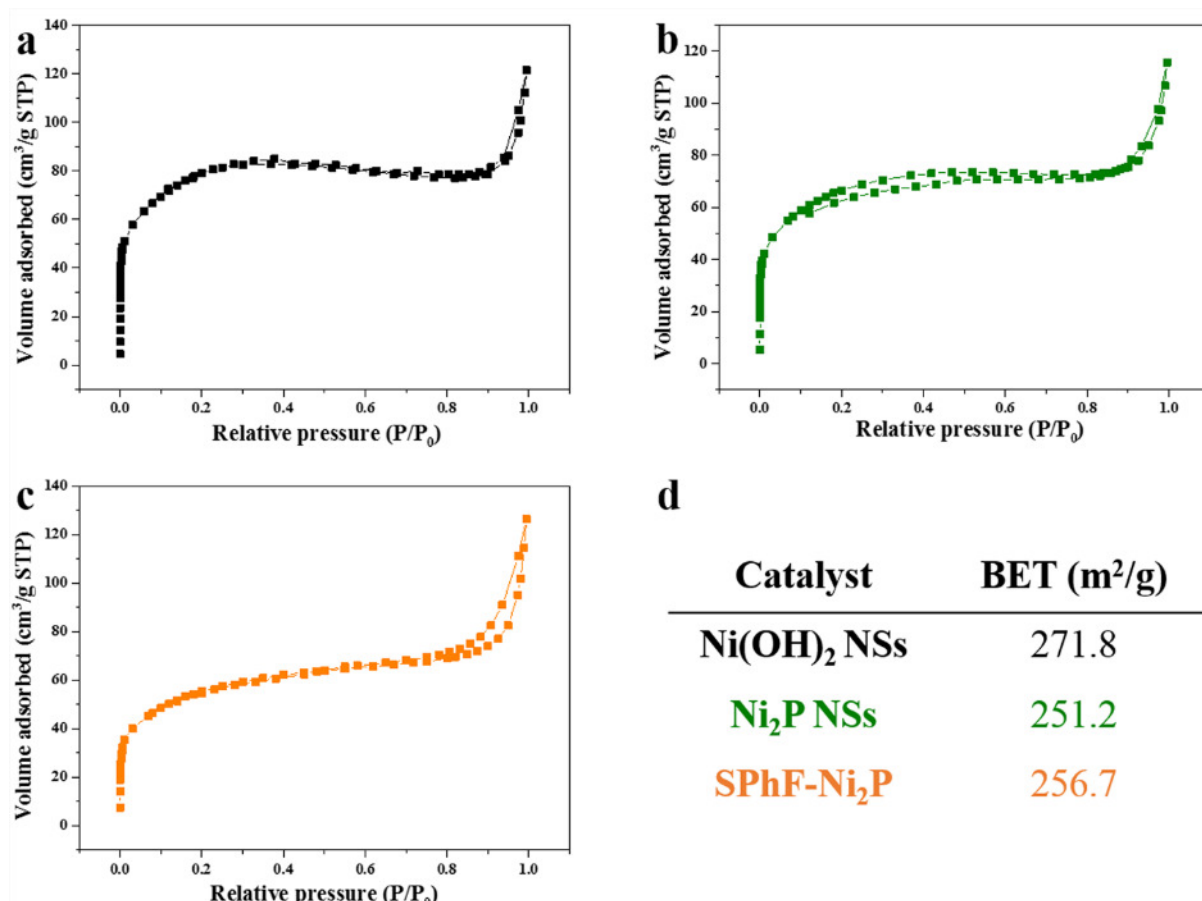

**Figure S5.** N<sub>2</sub> adsorption/desorption isotherm plots of (a) Ni(OH)<sub>2</sub> NSs, (b) Ni<sub>2</sub>P NSs, and (c) SPhF-Ni<sub>2</sub>P. (d) the corresponding BET areas.



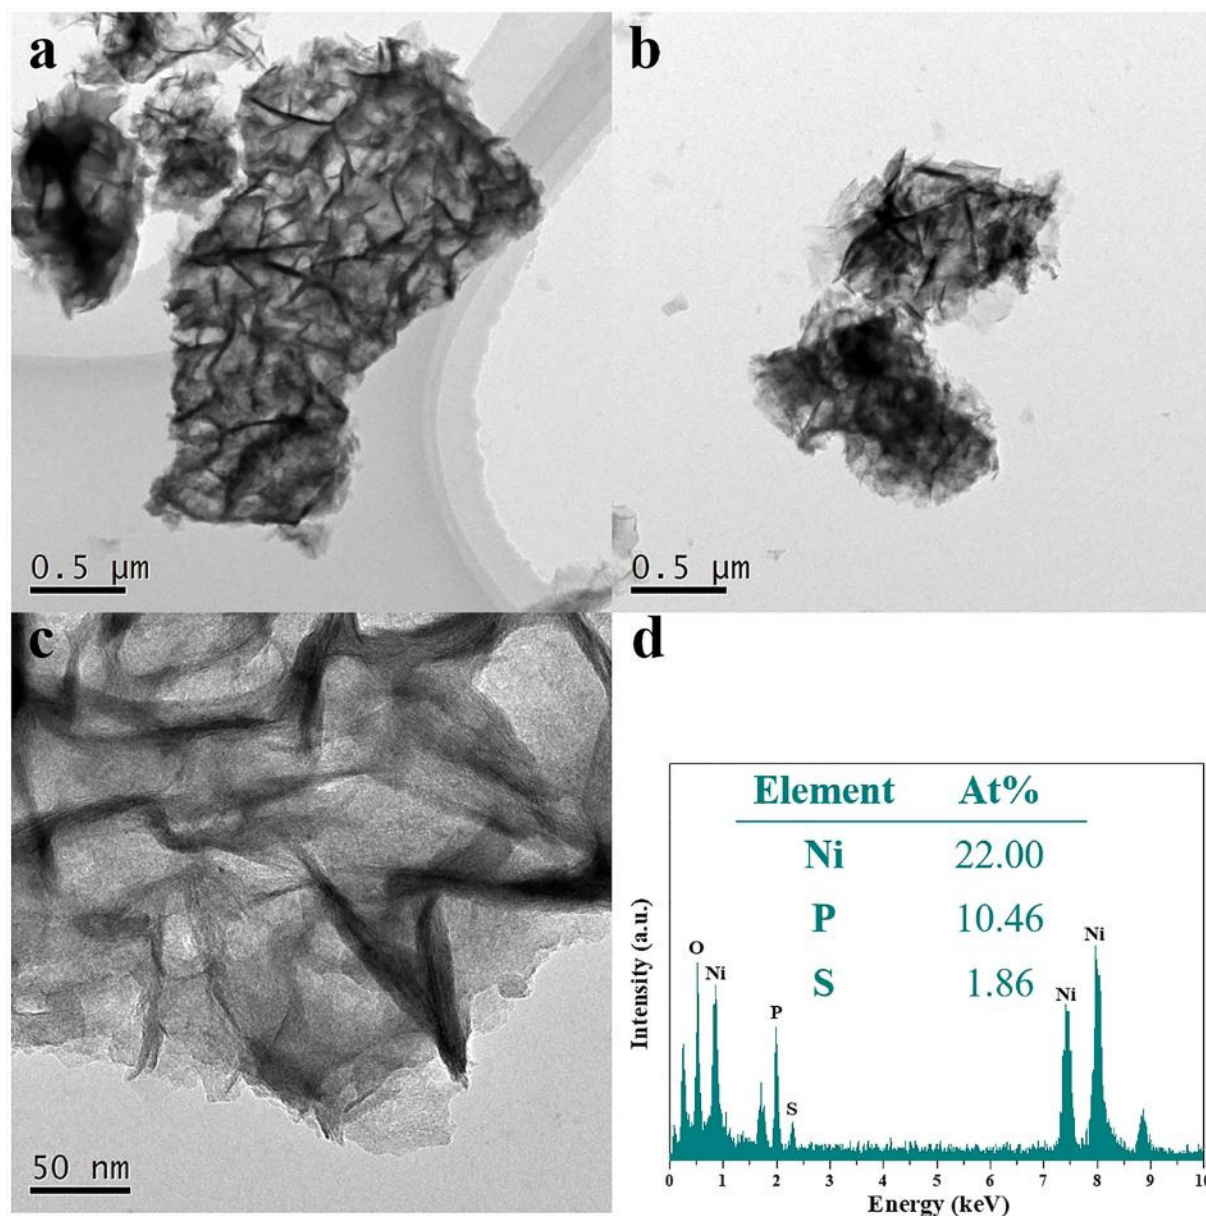

**Figure S6.** (a), (b), and (c) TEM images of SPhF-Ni<sub>2</sub>P. (d) TEM-EDX spectrum of SPhF-Ni<sub>2</sub>P.

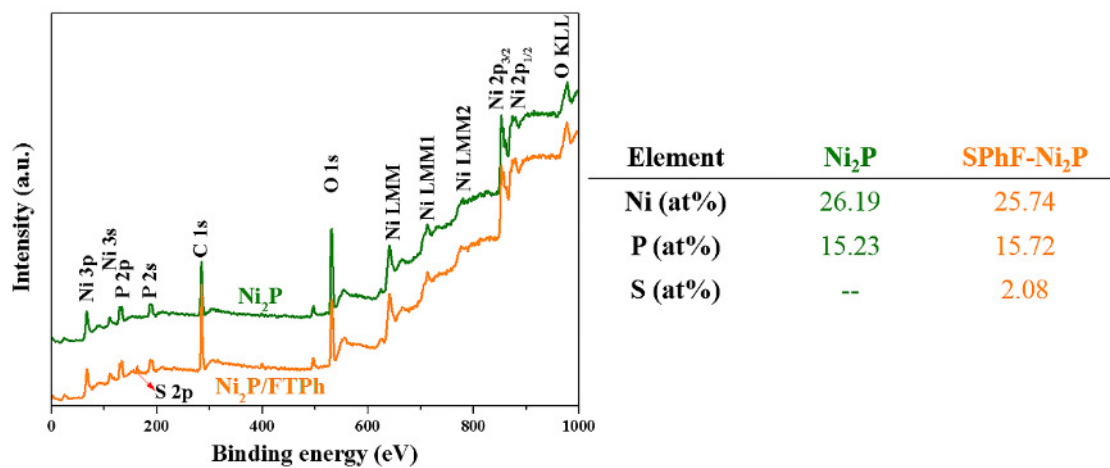

Figure S7. XPS survey spectra of Ni<sub>2</sub>P and SPhF-Ni<sub>2</sub>P and the corresponding element concentration.

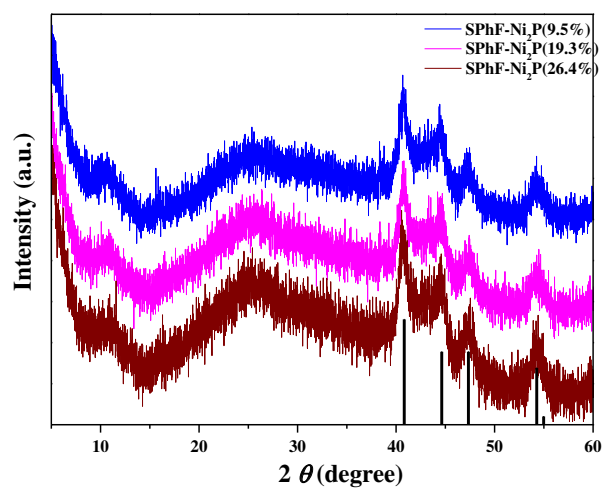

**Figure S8.** XRD patterns of SPhF-Ni<sub>2</sub>P (9.5%), SPhF-Ni<sub>2</sub>P (19.3%), and SPhF-Ni<sub>2</sub>P (26.4%), respectively.

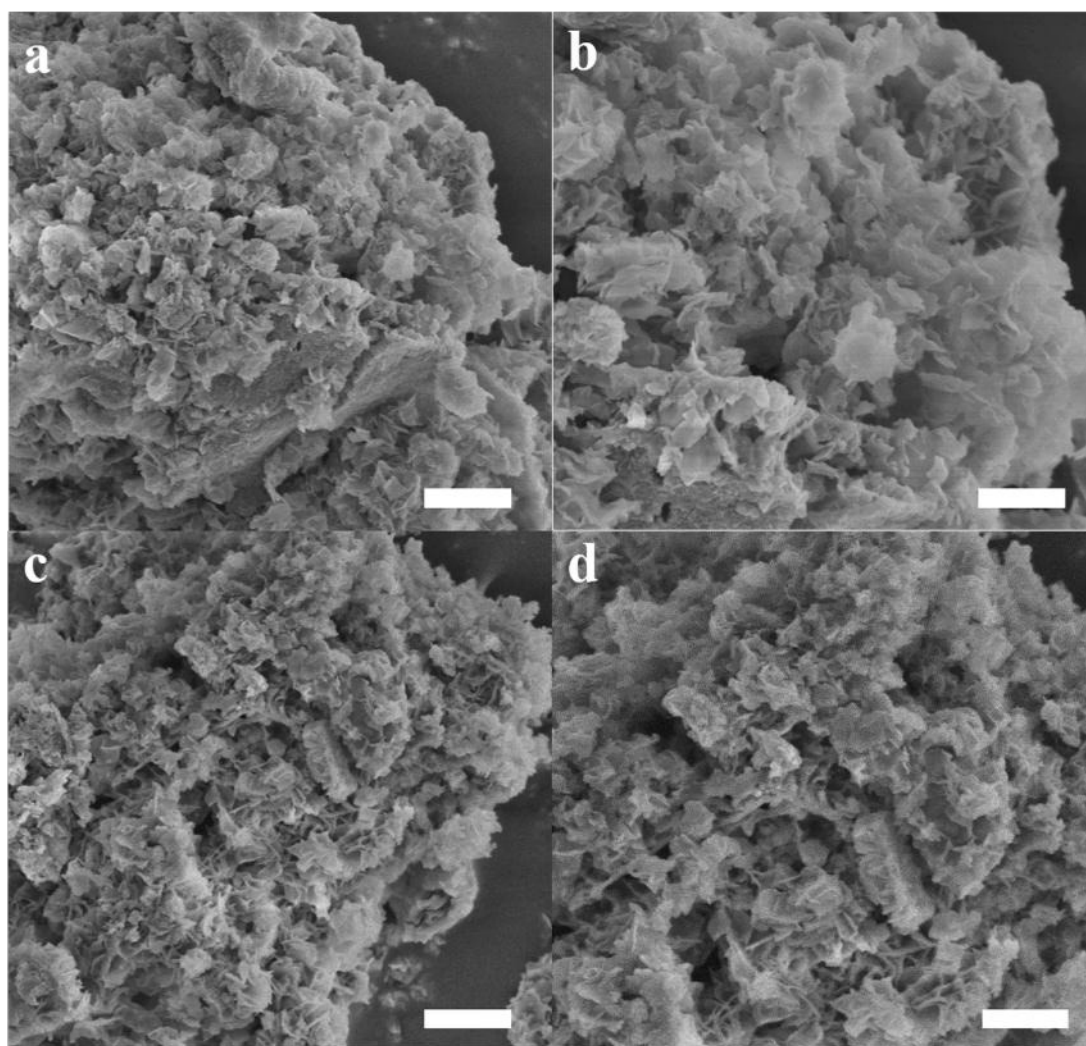

**Figure S9.** SEM images (scale bar 2  $\mu\text{m}$ ) of (a) SPhF-Ni<sub>2</sub>P(9.5%), (b) SPhF-Ni<sub>2</sub>P(19.3), (c) SPhF-Ni<sub>2</sub>P(26.4%), and (d) SPhF-Ni<sub>2</sub>P.

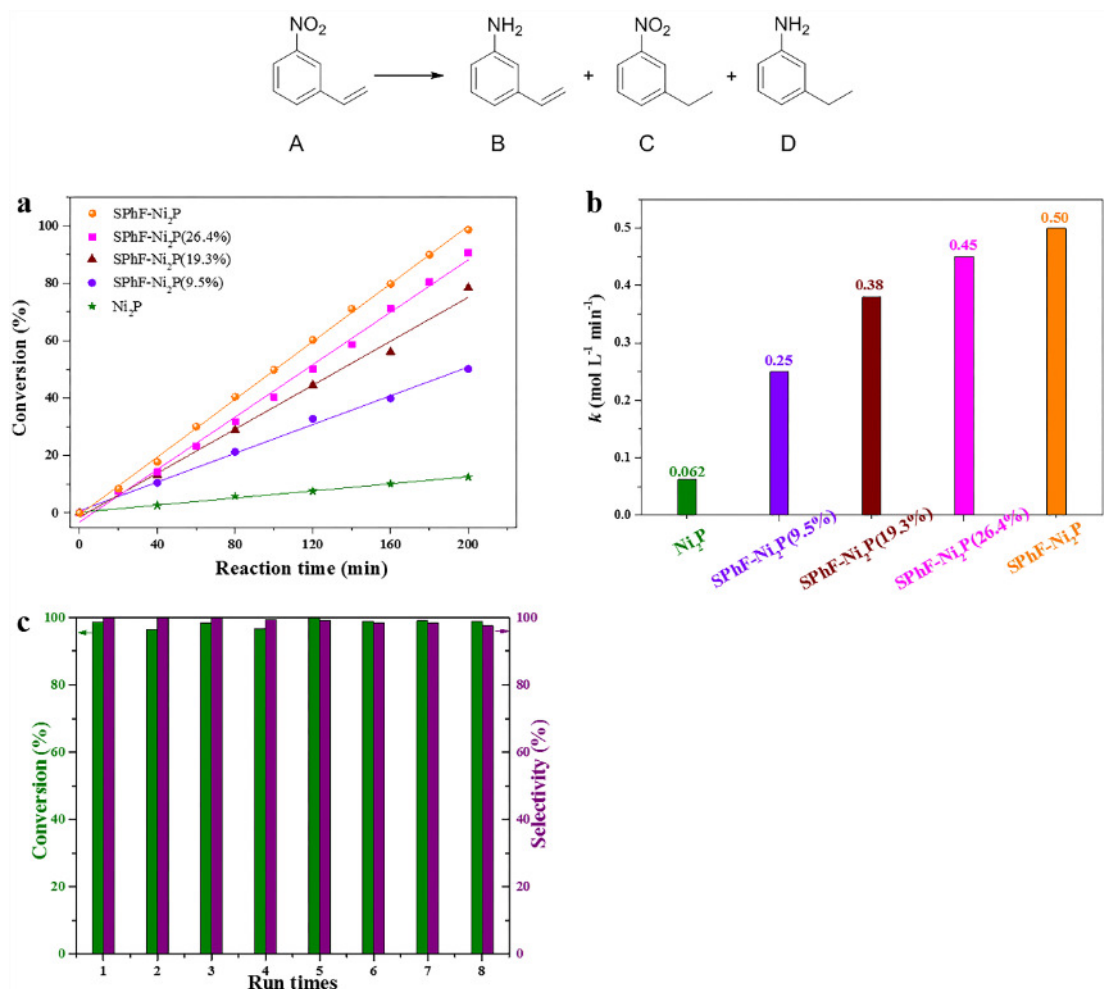

**Figure S10.** Selective hydrogenation of 3-nitrostyrene over Ni<sub>2</sub>P and SPhF-Ni<sub>2</sub>P catalysts. (a) Conversion of 3-nitrostyrene against reaction time; (b) Fitted reaction rate constants based on conversion of 3-nitrostyrene; (c) Recycling test of SPhF-Ni<sub>2</sub>P for hydrogenation of 3-nitrostyrene.

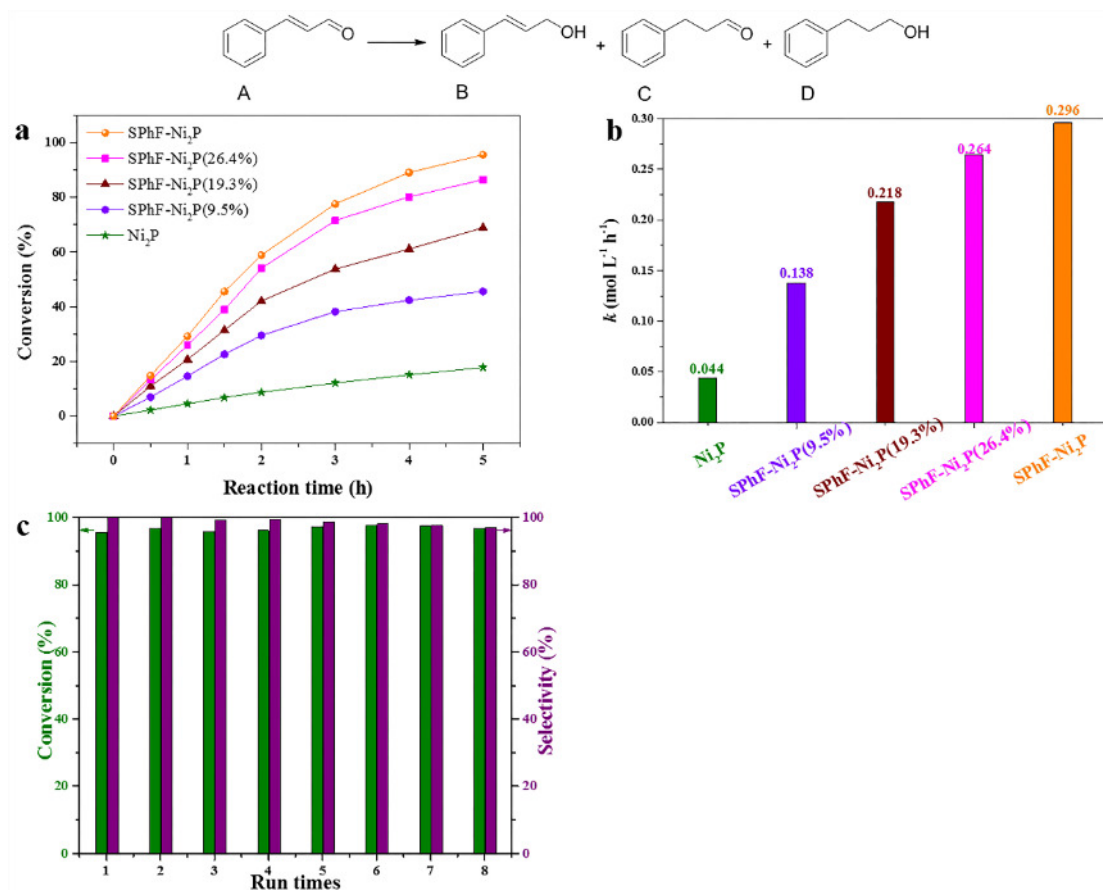

**Figure S11.** Selective hydrogenation of cinnamaldehyde over Ni<sub>2</sub>P and SPhF-Ni<sub>2</sub>P catalysts. (a) Conversion of cinnamaldehyde against reaction time; (b) Fitted reaction rate constants based on conversion of cinnamaldehyde; (c) Recycling test of SPhF-Ni<sub>2</sub>P for hydrogenation of cinnamaldehyde.

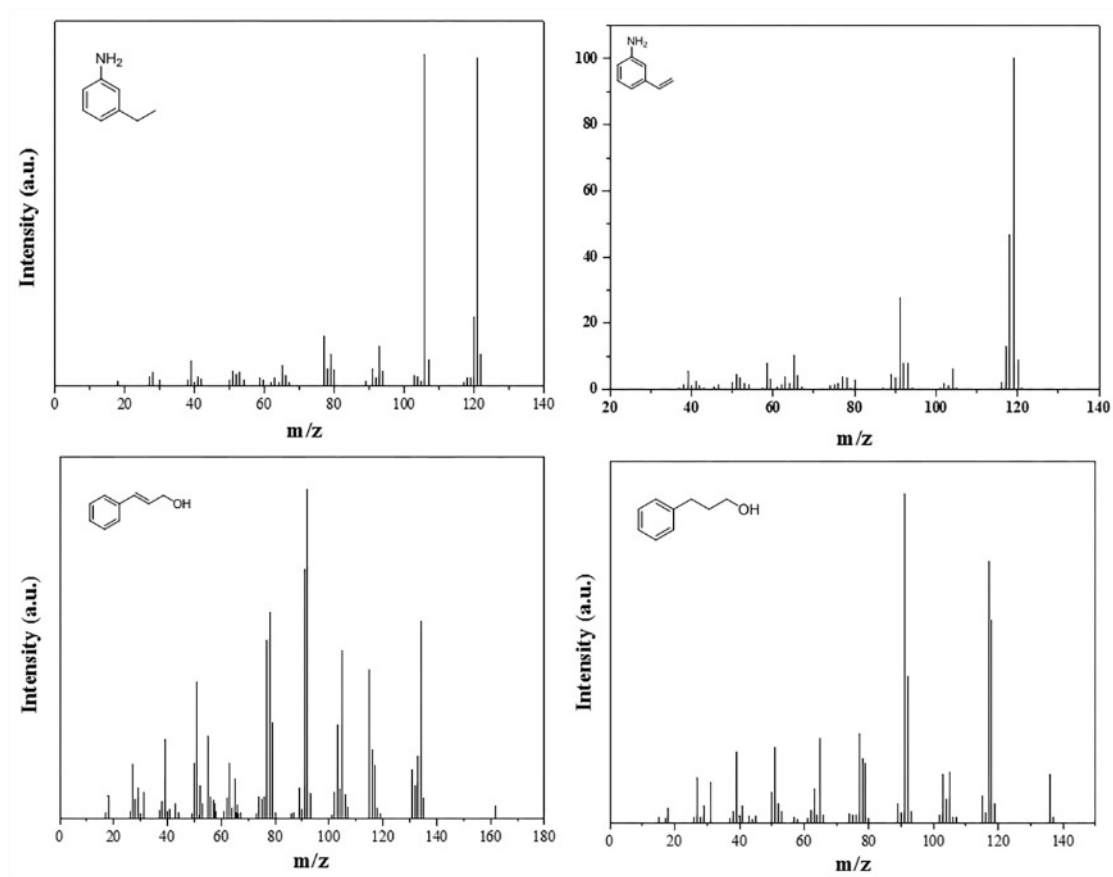

Figure S12. Supplemental MS spectra of products.

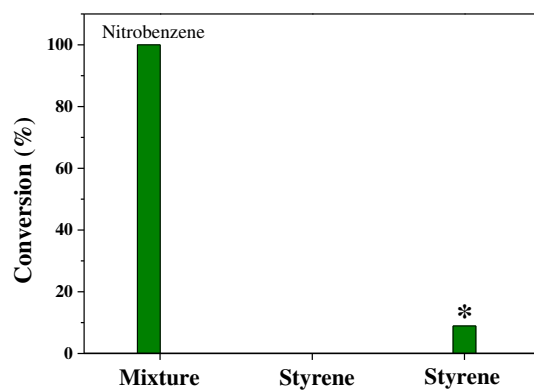

**Figure S13.** Competitive reaction over SPhF-Ni<sub>2</sub>P. Solo styrene and mixture of nitrobenzene and styrene are used as substrates over SPhF-Ni<sub>2</sub>P. Reaction conditions: 70 °C, 10 bar hydrogen, 10 mg catalyst, 5 mL ethanol. Substrates: 0.5 mmol styrene or mixture (0.25 mmol nitrobenzene and 0.25 mmol styrene). \*temperature: 120 °C.



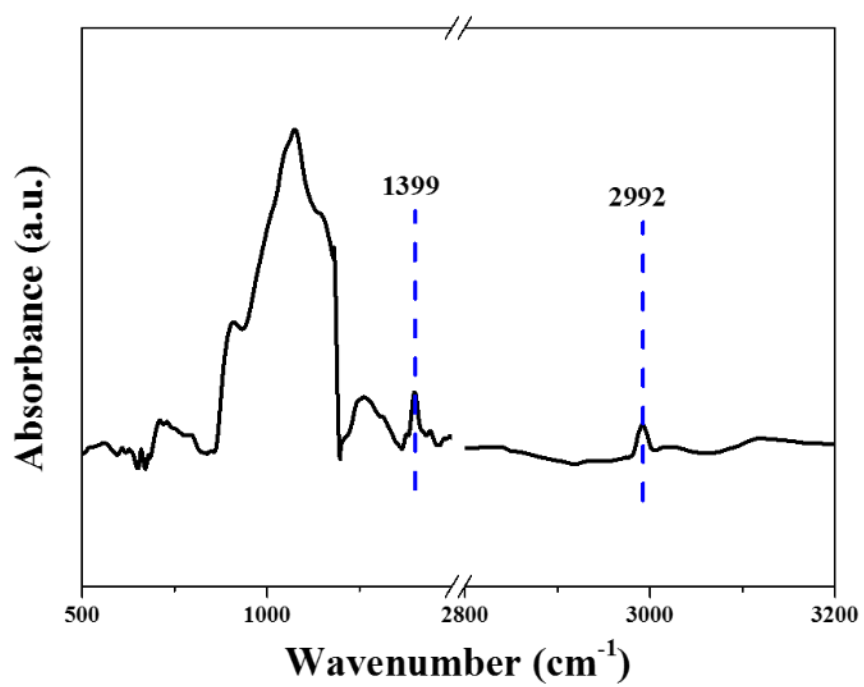

Figure S14. FT-IR spectra of SPhF-Ni<sub>2</sub>P after the recycling test.

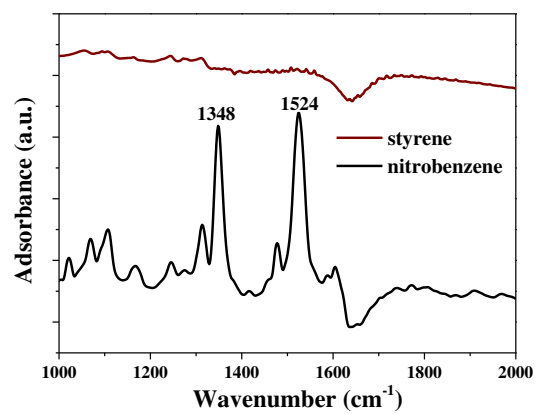

**Figure S15.** FT-IR spectra of solo styrene and nitrobenzene over SPhF-Ni<sub>2</sub>P.

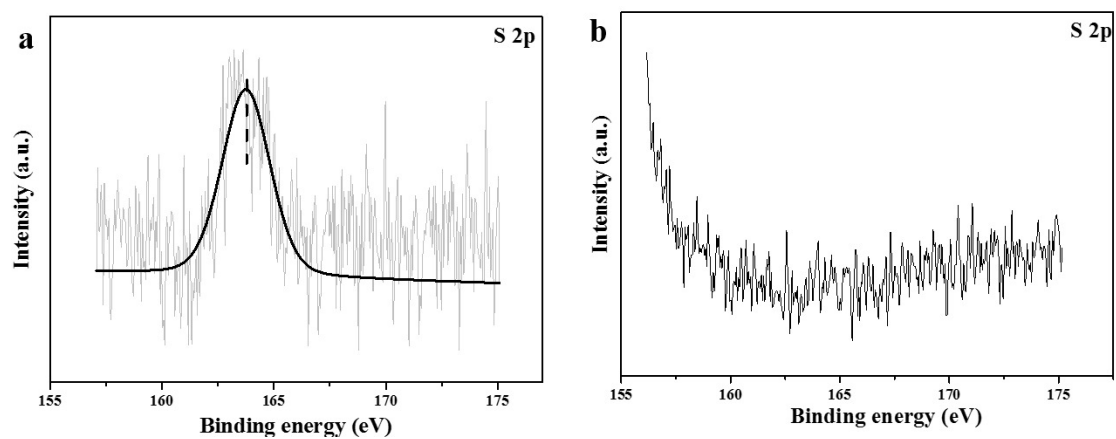

Figure S16. S 2p XPS spectra of (a) SPhF-Ni<sub>2</sub>P and (b) SPhF-Ni<sub>2</sub>P etched by argon-ion for 30 seconds.

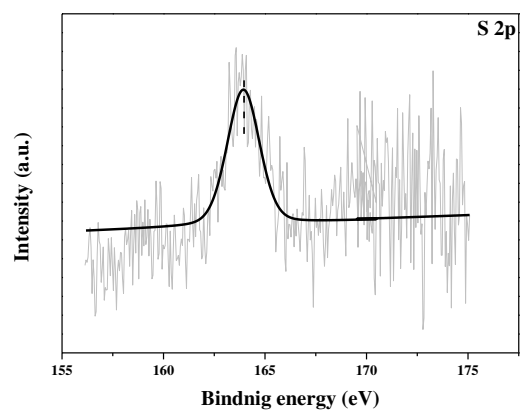

**Figure S17.** S 2p XPS spectra of SPhF-Ni<sub>2</sub>P after recycling test.

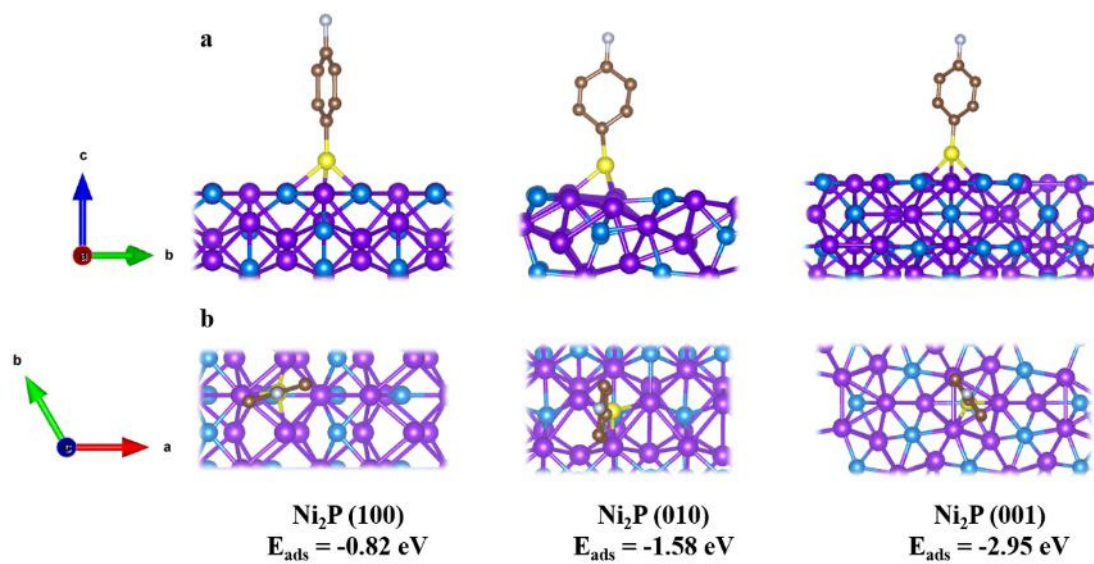

**Figure S18.** SPhF adsorption models on different Ni<sub>2</sub>P surfaces and the corresponding adsorption energies.

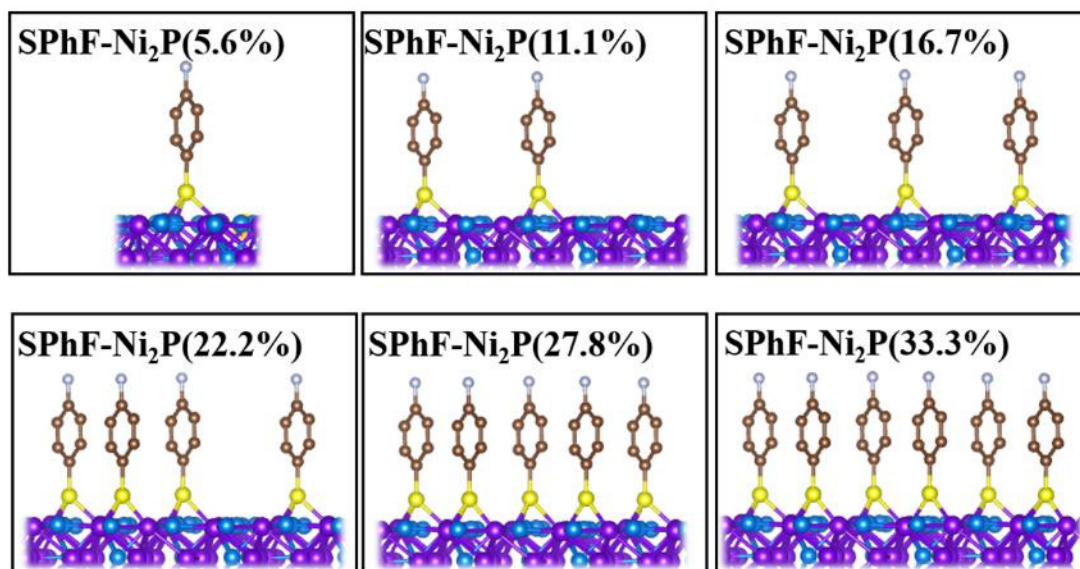

Figure S19. Adsorption models of different SPhF coverages on Ni<sub>2</sub>P (001).

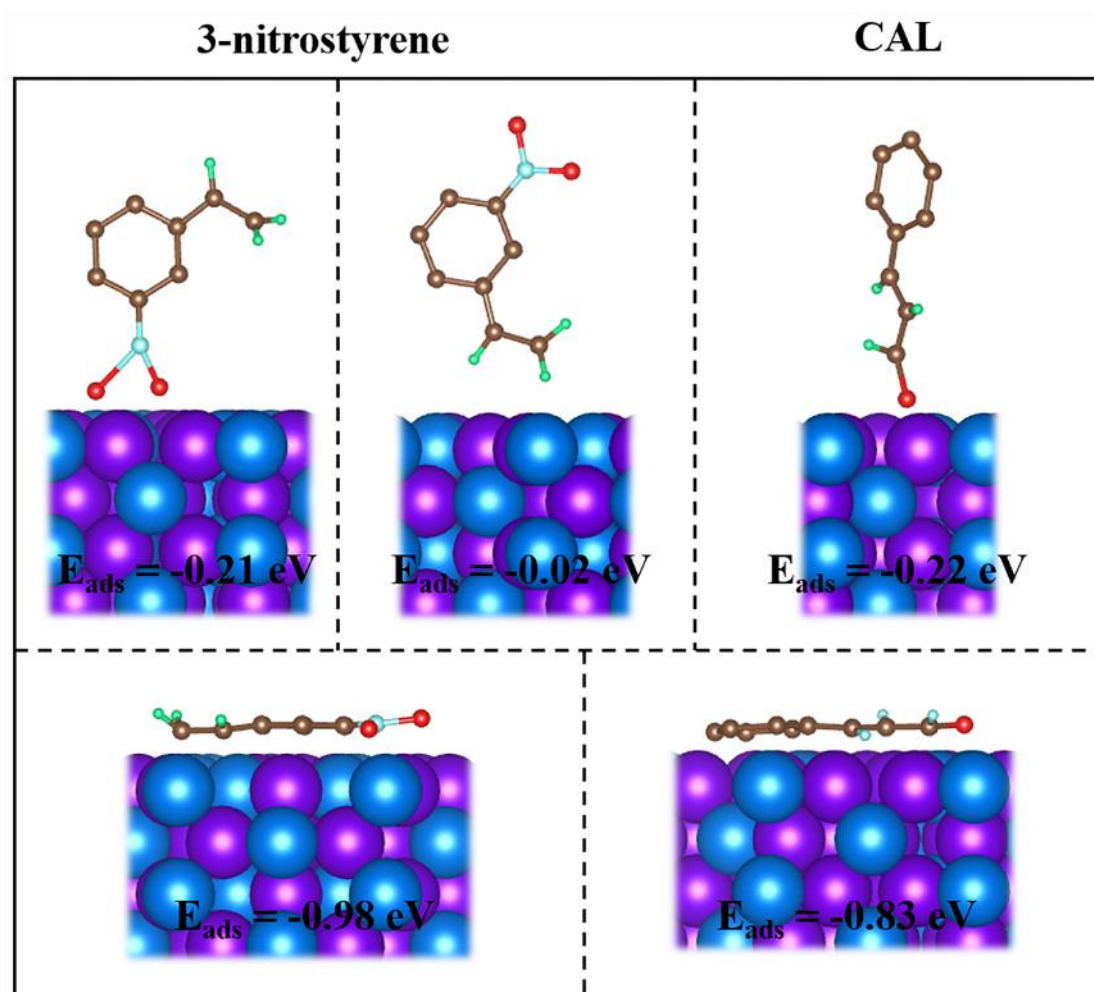

**Figure S20.** Different adsorption models of 3-nitrostyrene and cinnamaldehyde on Ni<sub>2</sub>P (001) surface and the corresponding adsorption energies.

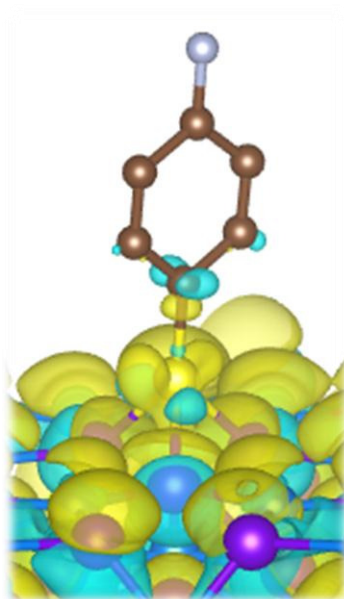

**Figure S21.** Differential charge density of SPhF adsorbed on Ni<sub>2</sub>P (001) surface (yellow and blue indicate electronic charge accumulation and depletion, respectively, with iso-surface value of  $0.002 \text{ e}\text{\AA}^{-3}$ ).



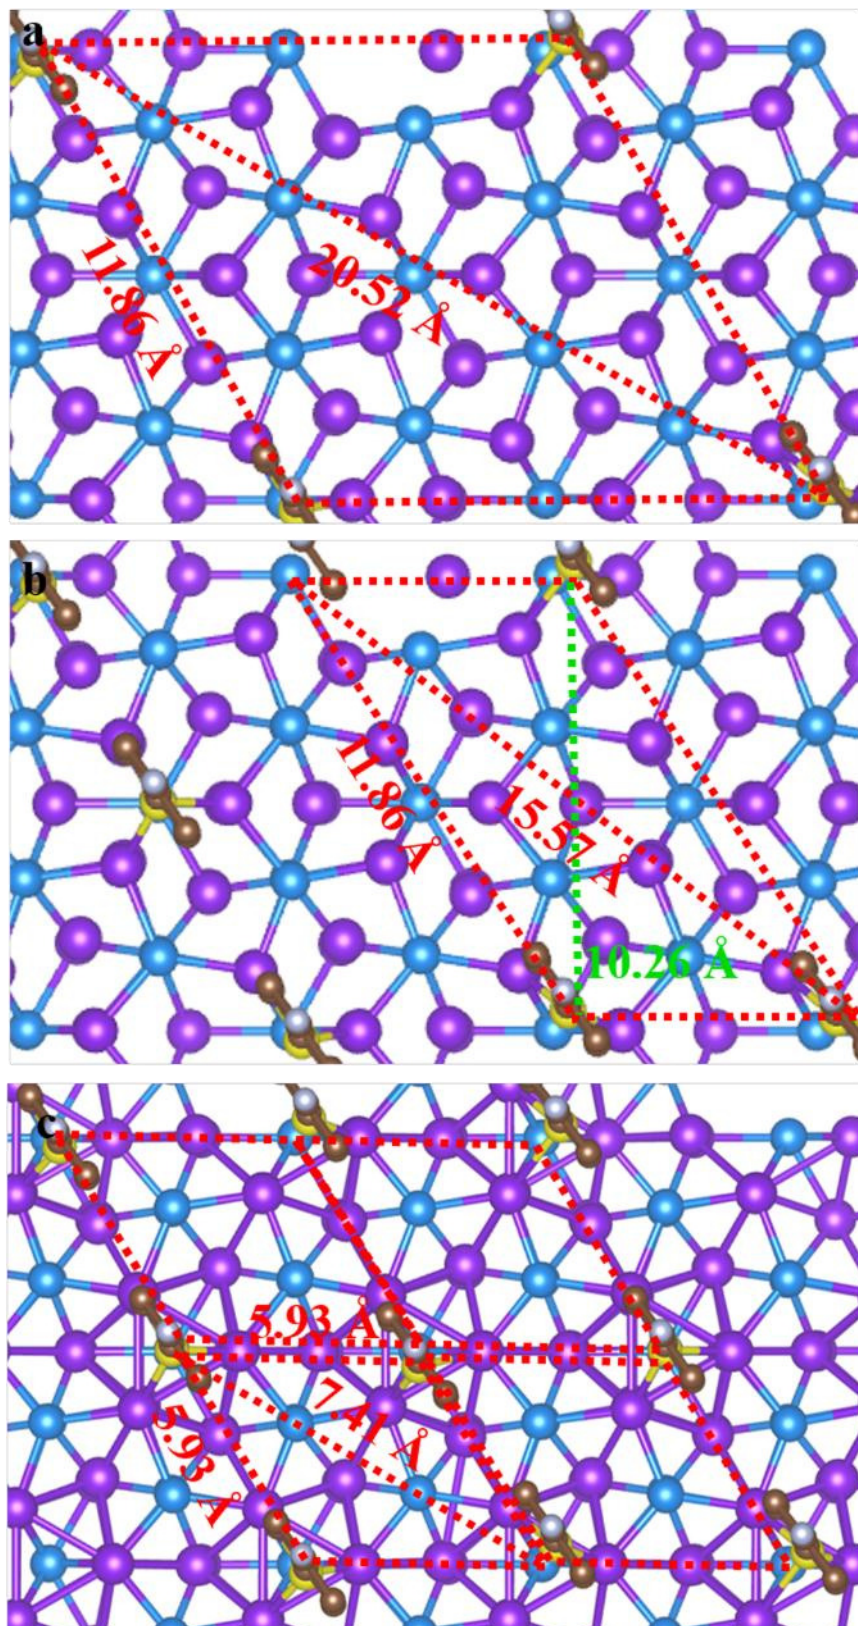

**Figure S22.** Proposed different distances between two adsorbed SPHF molecules on (a) Ni<sub>2</sub>P/SPhF(11.1%), (b) Ni<sub>2</sub>P/SPhF(22.2%) and (c) Ni<sub>2</sub>P/SPhF(33.3%)

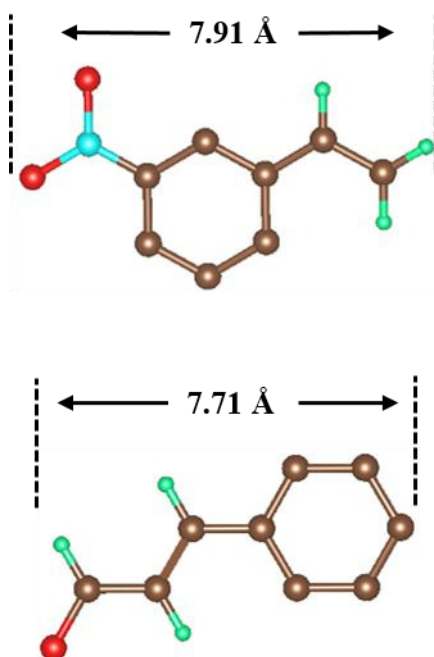

**Figure S23.** Relaxed 3-nitrostyrene and CAL molecules (red, cyan and green represent O, N and H atoms, respectively) and the corresponding length (key bond length:  $R_{C-O} = 1.51 \text{ \AA}$ ;  $R_{C-C} = 1.54 \text{ \AA}$ ;  $R_{C-N} = 1.51 \text{ \AA}$ ;  $R_{N-O} = 1.48 \text{ \AA}$ ).

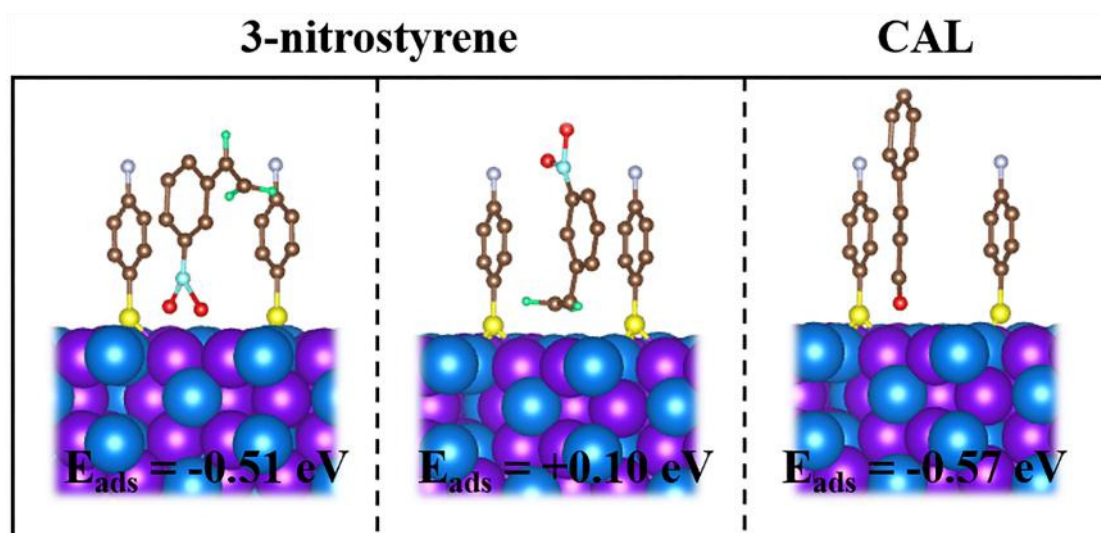

Figure S24. Different adsorption models of 3-nitrostyrene and cinnamaldehyde on SPhF-Ni<sub>2</sub>P interface and the corresponding adsorption energies.

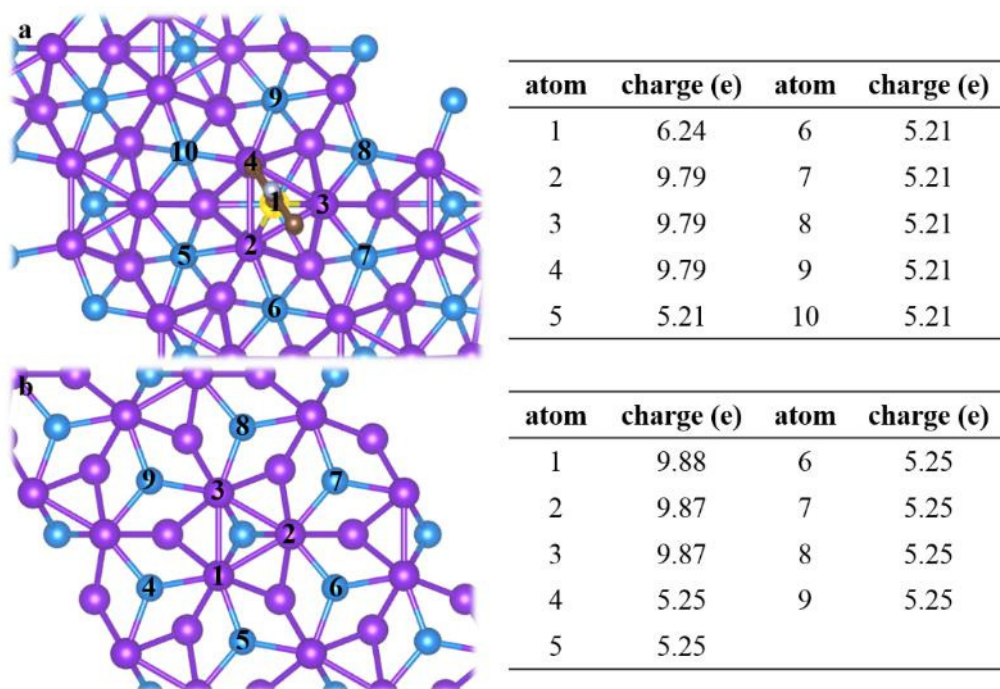

**Figure S25.** Bader charge analysis for (a) SPhF-Ni<sub>2</sub>P and (b) Ni<sub>2</sub>P (purple and blue represent Ni and P atoms, respectively).

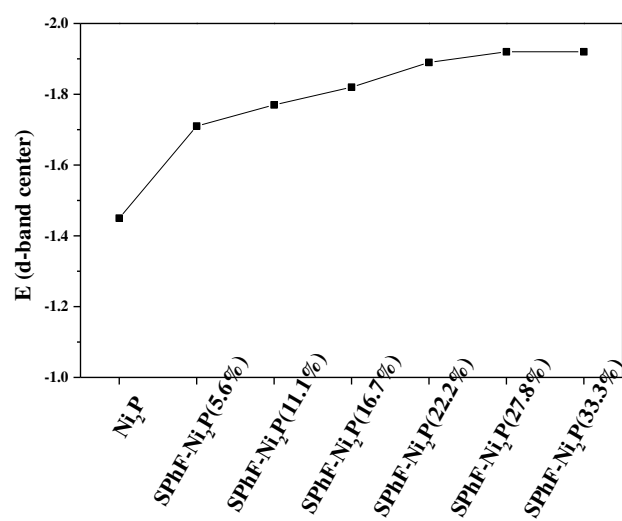

**Figure S26.** The d-band center of the functionalized Ni atoms as the function of SPhF coverage.

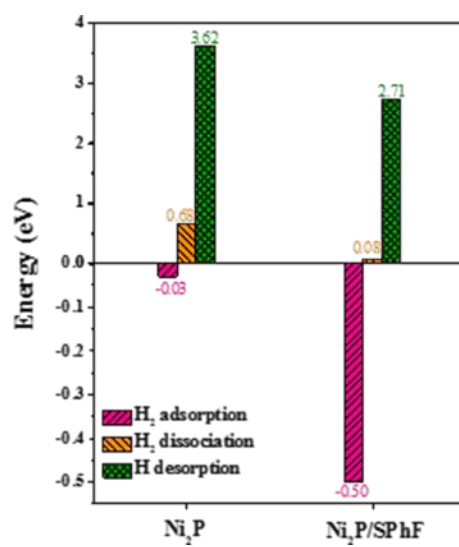

**Figure S27.** Energies of H<sub>2</sub> adsorption, dissociation, and desorption for Ni<sub>2</sub>P and SPhF-Ni<sub>2</sub>P(33.3%).

**Table S1.** The SPhF coverage of SPhF-Ni<sub>2</sub>P catalysts.

|                               | CO uptake (μmol/g) | Coverage (%) |
|-------------------------------|--------------------|--------------|
| Ni <sub>2</sub> P             | 254                | /            |
| S concentration (mg/g)        |                    |              |
| SPhF-Ni <sub>2</sub> P(9.5%)  | 0.77               | 9.5          |
| SPhF-Ni <sub>2</sub> P(19.3%) | 1.57               | 19.3         |
| SPhF-Ni <sub>2</sub> P(26.4%) | 2.15               | 26.4         |
| SPhF-Ni <sub>2</sub> P        | 2.76               | 33.9         |

**Note:** we hypothesis that CO molecules are adsorbed on Ni<sub>2</sub>P with the mono layer, therefore CO uptake can be regarded as the exposed number of Ni. The SPhF coverage is calculated as following equation :  $C_{SPhF} = \frac{c_S}{c_{CO}} \times 100\%$  ( $C_{SPhF}$ ,  $C_S$ ,  $C_{CO}$  represent the SPhF coverage, S concentration, and CO uptake, respectively).

**Table S2.** The optimization of reaction condition for selective hydrogenation of 3-nitrostyrene.

| Entry | Solvent          | Time (min) | Temperature (°C) | Pressure (MPa) | Conversion (%) | Selectivity (%) |
|-------|------------------|------------|------------------|----------------|----------------|-----------------|
| 1     | Ethanol          | 40         | 70               | 1.0            | 17.8           | >99.9           |
| 2     | Cyclohexane      | 40         | 70               | 1.0            | 3.7            | >99.9           |
| 3     | H <sub>2</sub> O | 40         | 70               | 1.0            | 28.6           | 91.2            |
| 4     | THF              | 40         | 70               | 1.0            | 6.8            | >99.9           |
| 5     | Ethanol          | 40         | 80               | 1.0            | 22.6           | >99.9           |
| 6     | Ethanol          | 40         | 90               | 1.0            | 27.4           | >99.9           |
| 7     | Ethanol          | 40         | 100              | 1.0            | 36.8           | >99.9           |
| 8     | Ethanol          | 40         | 70               | 1.5            | 19.5           | >99.9           |
| 9     | Ethanol          | 40         | 70               | 2.0            | 22.2           | >99.9           |
| 10    | Ethanol          | 40         | 70               | 2.5            | 25.1           | >99.9           |
| 11    | Ethanol          | 40         | 70               | 3.0            | 30.6           | >99.9           |
| 12    | Ethanol          | 900        | 70               | 1.0            | 100            | 98.8            |
| 13    | Ethanol          | 600        | 120              | 1.0            | 100            | 97.1            |

Reaction condition: 10 mg catalyst, 0.5 mmol 4-nitrobenzaldehyde, 5 mL solvent.



**Table S3.** The optimization of reaction condition for selective hydrogenation of cinnamaldehyde.

| Entry | Solvent          | Time (min) | Temperature (°C) | Pressure (MPa) | Conversion (%) | Selectivity (%) |
|-------|------------------|------------|------------------|----------------|----------------|-----------------|
| 1     | Ethanol          | 60         | 80               | 1.0            | 29.2           | >99.9           |
| 2     | Cyclohexane      | 60         | 80               | 1.0            | 5.5            | >99.9           |
| 3     | H <sub>2</sub> O | 60         | 80               | 1.0            | 40.6           | 91.2            |
| 4     | THF              | 60         | 80               | 1.0            | 9.8            | >99.9           |
| 5     | Ethanol          | 60         | 90               | 1.0            | 37.6           | >99.9           |
| 6     | Ethanol          | 60         | 100              | 1.0            | 44.5           | >99.9           |
| 7     | Ethanol          | 60         | 110              | 1.0            | 53.1           | >99.9           |
| 8     | Ethanol          | 60         | 80               | 1.5            | 29.5           | >99.9           |
| 9     | Ethanol          | 60         | 80               | 2.0            | 32.1           | >99.9           |
| 10    | Ethanol          | 60         | 80               | 2.5            | 34.2           | >99.9           |
| 11    | Ethanol          | 60         | 80               | 3.0            | 39.9           | >99.9           |
| 12    | Ethanol          | 900        | 80               | 1.0            | 100            | 99.0            |
| 13    | Ethanol          | 600        | 120              | 1.0            | 100            | 95.8            |

Reaction condition: 10 mg catalyst, 0.5 mmol 4-nitrobenzaldehyde, 5 mL solvent.

**Table S4.** Selective hydrogenation of 3-nitrostyrene using different catalysts.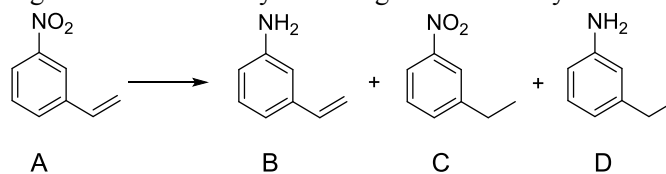

| Catalyst                                | T (°C) | Con. (%) | Yield (%) |      |      | Ref.                                                              |
|-----------------------------------------|--------|----------|-----------|------|------|-------------------------------------------------------------------|
|                                         |        |          | B         | C    | D    |                                                                   |
| SPhF-Ni <sub>2</sub> P                  | 70     | 100      | 99.0      | 0    | 1.0  | <b>This work</b>                                                  |
| Au <sub>25</sub> /ZnAl-HT-300           | 90     | 100      | 99.0      | 1.0  | 0    | <i>Angew. Chem. Int. Ed.</i> <b>2017</b> , <i>56</i> , 2709-2713. |
| 1.5 wt% Au-TiO <sub>2</sub>             | 90     | 100      | 86.3      | 12.6 | 1.1  | <i>Angew. Chem. Int. Ed.</i> <b>2017</b> , <i>56</i> , 2709-2713. |
| 1 wt% Pt/TiO <sub>2</sub>               | 80     | 100      | 0         | 32.0 | 62.0 | <i>ACS Catal.</i> <b>2012</b> , <i>2</i> , 2079-2081.             |
| Pd/C                                    | 120    | 99.0     | 0         | 23.8 | 75.1 | <i>Science</i> <b>2006</b> , <i>313</i> , 332-334.                |
| Pt/C                                    | 120    | 96.7     | 2.8       | 50.6 | 43.3 | <i>Science</i> <b>2006</b> , <i>313</i> , 332-334.                |
| Ni <sub>2</sub> P/PC-2                  | 80     | 96.1     | 99.0      | 1.0  | 0    | <i>ACS Catal.</i> <b>2018</b> , <i>8</i> , 8420-8429.             |
| CoS <sub>2</sub> /PC                    | 110    | >99.0    | 97.0      | 0    | 3.0  | <i>Green Chem.</i> <b>2018</b> , <i>20</i> , 671.                 |
| LaCu <sub>0.67</sub> Si <sub>1.33</sub> | 120    | 95.0     | 100       | -    | -    | <i>J. Am. Chem. Soc.</i> <b>2017</b> , <i>139</i> , 17089-17097.  |

**Table S5.** Selective hydrogenation of cinnamaldehyde using different catalysts.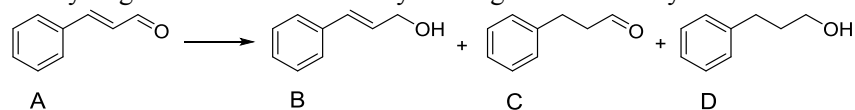

| Catalysts                                                          | T (°C) | Con. (%) | Yield (%) |      |      | Ref.                                                         |
|--------------------------------------------------------------------|--------|----------|-----------|------|------|--------------------------------------------------------------|
|                                                                    |        |          | B         | C    | D    |                                                              |
| SPhF-Ni <sub>2</sub> P                                             | 80     | 100      | 98.8      | 0    | 1.2  | <b>This work</b>                                             |
| PtNi <sub>2.20</sub><br>NWs@Ni/Fe <sub>4</sub> -MOF                | 40     | 99.5     | 83.3      | 15.1 | 1.65 | <i>Small</i> <b>2018</b> , <i>14</i> , 1704318.              |
| MIL-<br>101(Fe)@Pt@MIL-<br>101(Fe) <sup>9,2</sup>                  | 25     | 94.3     | 97.0      | 3.0  | 0    | <i>Nature</i> <b>2016</b> , <i>539</i> , 76.                 |
| MIL-<br>101(Cr)@Pt@MIL-<br>101(Fe) <sup>2,9</sup>                  | 25     | 99.8     | 95.6      | 3.6  | 0.8  |                                                              |
| Pt/Graphene                                                        | 60     | 92.0     | 88.0      | 7.0  | 3.0  | <i>ChemCatChem</i> <b>2014</b> , <i>6</i> , 3246.            |
| Pt@Uio-66-NH <sub>2</sub>                                          | 25     | 85.9     | 87.9      | -    | -    | <i>ACS Catal.</i> <b>2014</b> , <i>4</i> , 1340.             |
| Pt/MgAl-LDH                                                        | 60     | 79.7     | 85.4      | 1.0  | 13.3 | <i>Catal. Sci. Technol.</i> <b>2013</b> , <i>3</i> , 2819.   |
| PdSn/AC                                                            | 130    | 96.0     | 78.0      | -    | -    | <i>Catal. Commun.</i> <b>2014</b> , <i>43</i> , 102.         |
| NiCo/MWCNT                                                         | 150    | 30.0     | 69.0      | 0    | 31.0 | <i>Ind. Eng. Chem. Res.</i> <b>2014</b> , <i>53</i> , 13910. |
| CuAu/SiO <sub>2</sub>                                              | 100    | 65.0     | 65.0      | 13.0 | 22.0 | <i>AIChE J.</i> <b>2014</b> , <i>60</i> , 3300.              |
| CuCr/SBA-15                                                        | 150    | 11.0     | 52.0      | 18.0 | 30.0 | <i>Catal. Sci. Technol.</i> <b>2013</b> , <i>3</i> , 2319.   |
| Au/MgAlCeO <sub>2</sub>                                            | 120    | 91.0     | 44.0      | 14.0 | 41.0 | <i>Ind. Eng. Chem. Res.</i> <b>2013</b> , <i>52</i> , 288.   |
| Pt <sub>3</sub> Ni@Ni <sub>32</sub> Cu(OH) <sub>2</sub> -<br>2 NWs | 50     | 98.5     | 4.5       | 87.9 | 7.6  | <i>Adv. Funct. Mater.</i> <b>2018</b> , <i>28</i> , 1705918. |
